1 **Genetic Diversity Study of *Fusarium culmorum*: Causal agent of wheat crown rot in**

2 **Iraq**

3 O. N. Matny<sup>1</sup>, S. A. Shamsallah<sup>2</sup>, M. Haas<sup>3</sup>

4 <sup>1,2</sup> Department of Plant Protection, College of Agriculture, University of Baghdad, Iraq

5 email: schamsalah2@yahoo.com<sup>2</sup>. <sup>3</sup> University of Minnesota, Department of Plant

6 Pathology, USA, (current affiliation) Domestication Genomics, Leibniz Institute of Plant

7 Genetics and Crop Research (IPK), Corrensstrasse 3, 06466 Gatersleben, Germany.

8 Email: haas@ipk-gatersleben.de<sup>3</sup>.

9 **Corresponding Author:** [odaimatny@coagri.uobaghdad.edu.iq](mailto:odaimatny@coagri.uobaghdad.edu.iq)<sup>1</sup>, [onmatny@umn.edu](mailto:onmatny@umn.edu)

10

11

12

13

14

15

16

17

18

19

20

21

22

23

24

25 **ABSTRACT**

26 Fusarium crown rot (FCR), caused by *Fusarium culmorum* (Wm.G.Sm) Sacc., is an  
27 important disease of wheat both in Iraq and other regions of wheat production worldwide.  
28 Changes in environmental conditions and cultural practices such as crop rotation generate  
29 stress on pathogen populations leading to the evolution of new strains that can tolerate  
30 more stressful environments. This study aims to investigate the genetic diversity among  
31 isolates of *F. culmorum* in Iraq. Twenty-nine samples were collected from different  
32 regions of wheat cultivation in Iraq to investigate the pathogenicity and genetic diversity  
33 of *F. culmorum* using the REP-PCR technique. Among the twenty-nine isolates of *F.*  
34 *culmorum* examined for pathogenicity, 96% were pathogenic to wheat at the seedling  
35 stage. The most aggressive isolate, from Baghdad, was IF 0021 at 0.890 on the FCR  
36 severity index. Three primer sets were used to assess the genotypic diversity via REP,  
37 ERIC and BOX elements. The amplicon sizes ranged from 200-800 bp for BOX-ERIC2,  
38 110-1100 bp for ERIC-ERIC2 and 200-1300 bp for REP. In total, 410 markers were  
39 polymorphic, including 106 for BOX, 175 for ERIC and 129 for the REP. Genetic  
40 similarity was calculated by comparing markers according to minimum variance  
41 (Squared Euclidean). Clustering analysis generated two major groups, group 1 with two  
42 subgroup 1a and 1b with 5 and 12 isolates respectively, and group 2 with two subgroups  
43 2a and 2b with 3 and 9 isolates respectively. This is the first study in this field that has  
44 been reported in Iraq.

45 **Keyword:** Genetic Diversity, *Fusarium*, Pathogenicity, *Triticum aestivum*, REP-PCR.

46

47

48

## 49 INTRODUCTION

50 *Fusarium culmorum* (Wm.G.Sm) Sacc., a fungal plant pathogen with a wide host range  
51 and is the causal agent of several diseases on these plants. On wheat, *F. culmorum* causes  
52 two important diseases that can cause serious economic losses on wheat: head blight and  
53 crown rot (Burgess et al. 2001; Chakraborty et al. 2006). Reliable estimates for yield loss  
54 due to Fusarium crown rot (FCR) in Iraq are not available, but where data are available,  
55 FCR can be devastating. For example, FCR can reduce yields of winter wheat production  
56 in the Pacific Northwest region of the USA by up to 61% (Smiley et al. 2005). FCR also  
57 affects grain quality through the production of mycotoxins such as DOV, NIV, ZEN and  
58 T2-toxin which can be harmful to human, and livestock health (Pestka and Smolinski  
59 2005; Blandino et al. 2012).

60

61 Over the past 5 years, FCR re-emerged as an economically important disease in Iraq,  
62 causing significant yield losses to the wheat crop (Matny et al. 2012). A few studies on  
63 FCR have been carried out to understand the genetic diversity present in *F. culmorum*  
64 populations and to understand why this disease has re-emerged. Drought conditions in  
65 Iraq from 2011 to 2016 are likely a contributing factor to the spread of *F. culmorum* in  
66 wheat fields since many studies have shown that dry environments are favorable for *F.*  
67 *culmorum* growth and reproduction (Scherf et al. 2013; Balmas et al. 2006). FCR has  
68 also been reported in other Middle Eastern countries such as Turkey (Tunali et al. 2006;  
69 Emre et al. 2016), Iran (Hajieghrar 2009; Eslahi 2012) and Syria (Khalifeh et al. 2009).

70

71 Genetic diversity analyses of microorganisms have demonstrated that pathogen diversity  
72 depends on global environmental changes and shifts in agro-ecological systems (Saharan

73 and Naef 2008; Gurel et al. 2010). *F. culmorum* isolates show high levels of phenotypic  
74 and genotypic variability in culture, including colony morphology, pigmentation and  
75 sporulation (Puhalla 1981; Kollers et al. 2013; Miedaner et al. 2013). In addition,  
76 variation in aggressiveness and mycotoxin production have been found among various  
77 isolates that were collected from different geographic locations (Gang et al. 1998; Berna  
78 et al. 2012; Winter et al. 2013; Fang et al. 2015).

79

80 There are many methods and techniques used for studying the genetic diversity of  
81 microorganisms, including Repetitive Polymerase Chain Reaction (REP-PCR), also  
82 known as Repetitive DNA-based fingerprinting. The amplification of prokaryotic  
83 genomic sequences between the repetitive elements include: Repetitive Extragenic  
84 Palindromic (REP) sequences, Entero-bacterial Repetitive Intergenic Consensus (ERIC)  
85 sequences and BOX elements. REP-PCR applications are in widespread use among  
86 studies of plant pathogenic bacteria, but among eukaryotic microbes, have only been  
87 tested in *F. oxysporum* (Edel et al. 1995). The principle aim of this study is to  
88 characterize the genetic diversity among *F. culmorum* isolates collected in Iraq through  
89 REP-PCR and associate the results with their geographic distribution and pathogenicity  
90 toward wheat at the seedling stage.

91

## 92 **MATERIALS AND METHODS**

93

### 94 **Plant material and fungal isolation**

95 Wheat plants exhibiting FCR symptoms were collected from seven provinces  
96 representing different agricultural zones in Iraq. All samples were collected in paper

97 envelopes and necessary data (sample number, place and date of collection and host  
98 cultivar name) were recorded. The samples were brought to the laboratory and kept in a  
99 well-ventilated area at room temperature ( $25\pm 3^{\circ}\text{C}$  and 30% humidity) until the samples  
100 could be processed. The crown of wheat plants were cut into 0.5-1.0 cm segments, and  
101 treated with a 10% sodium hypochlorite (bleach) solution (diluted from commercially-  
102 available concentrated bleach) for 2 min, washed with sterile water and dried with filter  
103 paper. All samples were placed into 9 cm petri dishes containing potato dextrose agar  
104 (PDA). Fifty milligrams of Agrimycin-343 was added to the medium after autoclaving.  
105 Plates were incubated at  $25^{\circ}\text{C}\pm 2$  for 5 days and then a single *Fusarium* spp. spore was  
106 picked up (under a microscope at 400X) using a needle according to colony and spore  
107 characterization methodologies (Booth 1971; John and Brett 2006) and placed into a new  
108 petri dish containing PDA for use in pathogenicity assays.

109

### 110 **Pathogenicity assay**

111 For the pathogenicity assays, *F. culmorum* isolates were grown on autoclaved millet seed.  
112 First, one kilogram of millet seed was soaked in water for 12 h, then the water was  
113 drained, and several 250 ml flasks were filled with 50 g each of this millet seed and  
114 autoclaved at  $121^{\circ}\text{C}$  and  $1.5\text{ kg cm}^{-1}$  pressure for 20 min. One disc (0.5 cm) of a 7-day old  
115 *F. culmorum* colony was placed into each flask and incubated at  $25\pm 2^{\circ}\text{C}$  for 14 days.  
116 Pathogenicity tests were then performed on wheat seedlings. A 1:1 mixture of sterile soil  
117 and peat moss was autoclaved at  $121^{\circ}\text{C}$  and  $1.5\text{ kg cm}^{-1}$  pressure for 1h. This process  
118 was repeated on two separate days. Pots ( $5 \times 10\text{ cm}$ ) used in the greenhouse experiments  
119 were filled with the mixture soil and 5 g of *F. culmorum* inoculum was added to each pot  
120 in the top 5 cm surface layer of the soil. All pots were watered and placed in the

121 greenhouse for 2 days  $25\pm 2$ . Three seeds of *Triticum aestivum* L. cv. Abu-Ghreeb1 (a  
122 commonly used cultivar used in Iraq) were sown in each pot, and each treatment repeated  
123 three times. Plants were irrigated with sterilized water as needed. After 35 days, crown  
124 rot symptoms and stem discoloration characteristic of FCR were apparent on the  
125 inoculated plants. FCR Severity was calculated by measuring the length of discoloration  
126 relative to seedling height. The FCR severity index was obtained by multiplying this ratio  
127 by the number of leaf-sheath layers with necrosis. The FCR index was calculated  
128 according to the following formula: (length of stem discoloration/seedling height)  $\times$   
129 (number of leaf sheath layers with necrosis) (Mitter et al. 2006).

130

### 131 **Fungal growth and DNA extraction**

132 Twenty- nine *Fusarium* spp. isolates were grown on PDA media in 9 cm petri dish for 7  
133 days at  $25\pm 2^\circ\text{C}$ . The REDEExtract-N-AMP<sup>TM</sup> Plant PCR kit (Sigma-Aldrich, St. Louis,  
134 MO, USA) was used for DNA extraction according to manufacturer's instructions.  
135 Briefly the hyphal tip of the mycelium was harvested with a sterilized needle and placed  
136 in 0.2 ml collection tubes, to which 50  $\mu\text{l}$  extraction solution was added, followed by  
137 incubation at  $95^\circ\text{C}$  for 10 min. The DNA concentrations and quality were measured to  
138 ensure quality using a Nanodrop 2000 spectrophotometer (Thermo Fisher Scientific,  
139 USA), qualitative analyses of DNA were carried out via agarose gel electrophoresis.

140

### 141 **Amplification of fungal DNA**

142 Species identification of *Fusarium* spp. isolates was determined by amplifying and  
143 sequencing the Translation Elongation Factor 1 alpha (TEF-1 $\alpha$ ) gene. Forward (EF1) 5'-  
144 ATGGGTAAGGA(A/G)GACAAGAC-3' and reverse (EF2) 5'-GGA(G/A)GTAC

145 CAGT(G/C)ATCATG-3' (O'Donnell et al. 2000) primers were used to amplify the TEF-  
146 1  $\alpha$  gene. The PCR reaction solution was prepared at total volume of 20  $\mu$ l. The PCR  
147 conditions were as follows: an initial denaturation at 95°C for 5 min followed by 35  
148 cycles of denaturation at 94°C for 50 s, annealing at 53°C for 50 s, extension at 72°C for 1  
149 min, and a final extension at 72°C for 7 min. Amplification products were visualized on  
150 1.0% agarose gel stained with SYBR™ safe DNA gel stain in 1X TAE (Invitrogen™,  
151 Carlsbad, CA, USA). Amplification of a product approximately 700 bp long was  
152 generated by PCR from the DNA template.

153

#### 154 **DNA sequencing**

155 The PCR products of TEF-1 $\alpha$  were prepared for sequencing by cleaning up with the  
156 QiAquick® PCR purification kit (city? Bogota?, Colombia). Sequencing was carried out  
157 commercially (ACGT, Inc., Chicago, USA). The sequencing chromatograms were read  
158 and aligned using MEGA6 software and the sequences were compared with those in  
159 GenBank (<http://www.ncbi.nlm.nih.gov/>) for the TEF-1 $\alpha$  gene using the Basic Local  
160 Alignment Search Tool (BLAST). All sequences of the isolates were sent to GenBank to  
161 obtain accession numbers.

162

#### 163 **Genetic diversity study**

164 *F. culmorum* isolates collected from different regions of Iraq were genotyped using three  
165 primer pairs designed to amplify multiple regions of the genome simultaneously: (1)  
166 REP1R-Dt (5'- III NCGNCATCNGGC-3') and REP-2G (5'-GCGGCTTATCGG  
167 GCCTAC-3') for REP; (2) ERIC 1 (5'-ATG TAAGCTCCTGGGGATTAC-3') and  
168 ERIC 2 (5'-AAGTAAGTGACTGG GGTGAGCG-3') for ERIC, and (3) BOX-A1R (5'-

169 CTACGGCAAG GCGACGCTGACG-3') (Versalovic et al. 1991) for BOX- ERIC2. The  
170 PCR conditions were: an initial denaturation at 94°C for 5 min, followed by 40 cycles of  
171 94°C for 1 min, an annealing step of 50°C (BOX and ERIC) or 37°C (REP) for 1 min,  
172 and an extension at 72°C for 2 min, followed by a final extension at 72°C for 15 min.  
173 Amplification products were visualized on 1.5% agarose gels with SYBR™ safe DNA gel  
174 stain in 1X TAE (Invitrogen™). In total, 410 potential markers were generated by this  
175 method for genotyping. REP-PCR markers were evaluated together in pair-wise  
176 comparisons. Single and shared fragments were analyzed using by Multivariate Statistical  
177 Package (MVSP) 3.22 program, the similarity was calculated according to minimum  
178 variance (Squared Euclidean) (Kovach 2001).

179

## 180 **RESULTS**

181 Pathogenicity tests for *F. culmorum* on wheat seedlings demonstrated that the collected  
182 isolates vary in their pathogenicity toward wheat cultivar Abu-Grheeb1, ranging from  
183 0.001 to 0.890 on the FCR severity index; however, some isolates (IF 0003, IF 0013, IF  
184 0024) were non-pathogenic, with a score of 0.00 on the FCR severity index. The isolates  
185 that resulted in the highest FCR severity index scores were: IF 0021, IF 0028, IF 0045, IF  
186 0046, IF 0015, and IF 0005. Isolates IF 0021, IF 0028, IF 0045 and IF 0046 originate  
187 from Baghdad while IF 0015 and IF 0005 come from Anbar and Diyala provinces,  
188 respectively (Table 1).

189

190

191



192 Table 1. *Fusarium culmorum* accessions used in this study including loci information,  
 193 TEF-1 $\alpha$  gene test and disease severity index.

| No. | Accession No. | Isolate No. | Species            | Location | TEF-1 $\alpha$ gene | FCR severity index |
|-----|---------------|-------------|--------------------|----------|---------------------|--------------------|
| 1   | KY205745      | IF 0003     | <i>F. culmorum</i> | Karbala  | +                   | 0.00               |
| 2   | KY205746      | IF 0004     | <i>F. culmorum</i> | Karbala  | +                   | 0.030              |
| 3   | KY190104      | IF 0005     | <i>F. culmorum</i> | Diyala   | +                   | 0.286              |
| 4   | KY190106      | IF 0006     | <i>F. culmorum</i> | Diyala   | +                   | 0.001              |
| 5   | KY190111      | IF 0007     | <i>F. culmorum</i> | Diyala   | +                   | 0.074              |
| 6   | KY190107      | IF 0008     | <i>F. culmorum</i> | Diyala   | +                   | 0.002              |
| 7   | KY190127      | IF 0009     | <i>F. culmorum</i> | Kirkuk   | +                   | 0.098              |
| 8   | KY190118      | IF 0013     | <i>F. culmorum</i> | Anbar    | +                   | 0.00               |
| 9   | KY190123      | IF 0014     | <i>F. culmorum</i> | Anbar    | +                   | 0.011              |
| 10  | KY190116      | IF 0015     | <i>F. culmorum</i> | Anbar    | +                   | 0.309              |
| 11  | KY190108      | IF 0017     | <i>F. culmorum</i> | Najaf    | +                   | 0.022              |
| 12  | KY205747      | IF 0021     | <i>F. culmorum</i> | Baghdad  | +                   | 0.890              |
| 13  | KY190121      | IF 0022     | <i>F. culmorum</i> | Baghdad  | +                   | 0.294              |
| 14  | KY190126      | IF 0024     | <i>F. culmorum</i> | Diyala   | +                   | 0.00               |
| 15  | KY190122      | IF 0026     | <i>F. culmorum</i> | Anbar    | +                   | 0.050              |
| 16  | KY190112      | IF 0028     | <i>F. culmorum</i> | Baghdad  | +                   | 0.543              |
| 17  | KY205748      | IF 0029     | <i>F. culmorum</i> | Baghdad  | +                   | 0.004              |
| 18  | KY190109      | IF 0030     | <i>F. culmorum</i> | Kirkuk   | +                   | 0.001              |
| 19  | KY190113      | IF 0031     | <i>F. culmorum</i> | Kirkuk   | +                   | 0.030              |

|    |          |         |                    |         |   |       |
|----|----------|---------|--------------------|---------|---|-------|
| 20 | KY190114 | IF 0032 | <i>F. culmorum</i> | Kirkuk  | + | 0.002 |
| 21 | KY190117 | IF 0033 | <i>F. culmorum</i> | Kirkuk  | + | 0.004 |
| 22 | KY190124 | IF 0040 | <i>F. culmorum</i> | Babylon | + | 0.076 |
| 23 | KY190110 | IF 0041 | <i>F. culmorum</i> | Babylon | + | 0.005 |
| 24 | KY190119 | IF 0042 | <i>F. culmorum</i> | Babylon | + | 0.001 |
| 25 | KY205749 | IF 0044 | <i>F. culmorum</i> | Diyala  | + | 0.019 |
| 26 | KY190105 | IF 0045 | <i>F. culmorum</i> | Baghdad | + | 0.350 |
| 27 | KY190125 | IF 0046 | <i>F. culmorum</i> | Baghdad | + | 0.200 |
| 28 | KY190120 | IF 0047 | <i>F. culmorum</i> | Baghdad | + | 0.008 |
| 29 | KY190115 | IF 0052 | <i>F. culmorum</i> | Anbar   | + | 0.010 |

194

195 The results of species-specific identification using TEF-1 $\alpha$  demonstrated that all isolates  
196 used in this study are in fact *F. culmorum*.

197 The genetic diversity study showed monomorphic and polymorphic bands pattern. The  
198 annealing temperature for the BOX, ERIC and REP primers used in this study were  
199 different from the output provided by Gurel et al. (2010). In this study, we found the  
200 optimum annealing temperature for the primers was 50°C for BOX and ERIC, and 37°C  
201 for REP. The PCR bands for the final amplification products were between 200-800 bp  
202 for BOX-ERIC2, 110-1100 bp for ERIC-ERIC2, and 200-1300 bp for REP. A total of  
203 410 polymorphic markers were identified in this study for the *F. culmorum* isolates,  
204 including 106 for BOX, ERIC for 175 and 129 for the REP-PCR. These markers were  
205 used to evaluation the minimum variance between the strains (Fig. 2).

206

207 Minimum variance cluster analysis was used to detect the variance between the *F.*  
208 *culmorum* isolates (fig.1). The dendrogram illustrates separated the isolates into major  
209 groups in this present study. Group 1 includes 17 isolates and may be divided into two  
210 sub-groups (1A and 1B) consisting of 5 and 11 isolates, respectively. All isolates in this  
211 group were collected from northern and central sites in Iraq. Group 2 consists of 12  
212 isolates and may also be divided into two subgroups (2A and 2B) consisting of 3 and 9  
213 isolates, respectively. Group 2A isolates originate from central Iraq while group 2B  
214 isolates come from northern, central, and southern Iraq.

215

216 Isolates IF0022 and IF0026 share the highest similarity values (100% similar). There is  
217 no relationship between the geographic origin of the isolate and its genetic relationship to  
218 other isolates (Fig. 1). One of the reasons is because of the use of seed that has not been  
219 certified by the Iraqi Ministry of Agriculture and the exchange of seed between farmers  
220 across different regions leading to the transfer the pathogen with the seed from one  
221 province to another. Also, some farmers obtain their seed from local markets where the  
222 seed source is unknow.

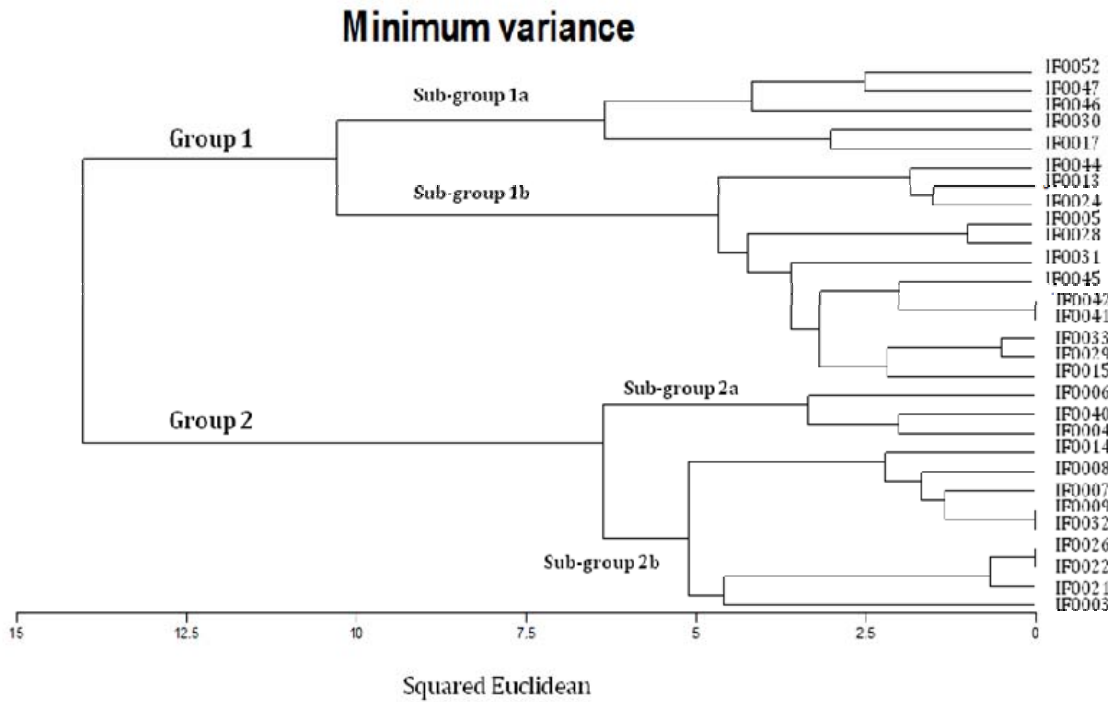

223

224 **Figure 1.** Dendrogram of 29 *Fusarium culmorum* isolates generated based on the number  
225 of bands and position of appearance for three primers BOX-ERIC2, ERIC-ERIC2 and  
226 REP by using Multivariate Statistical Package (MVSP) 3.22 program to show minimum  
227 variance (Squared Euclidean).

228

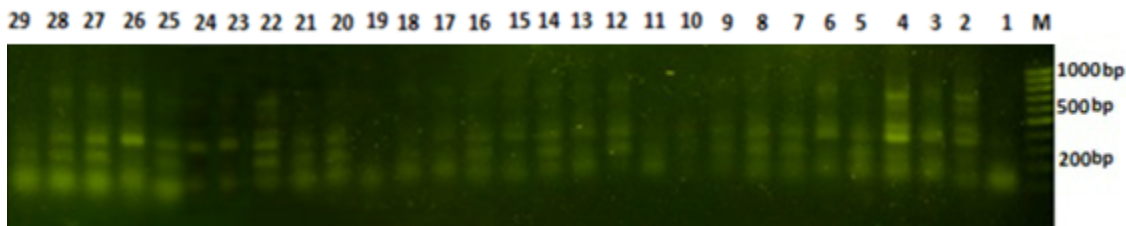

229

230 (A) BOX-ERIC2

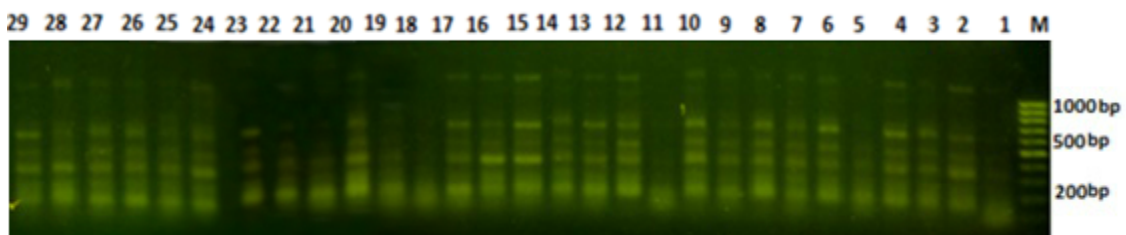

231

232 (B) ERIC-ERIC2

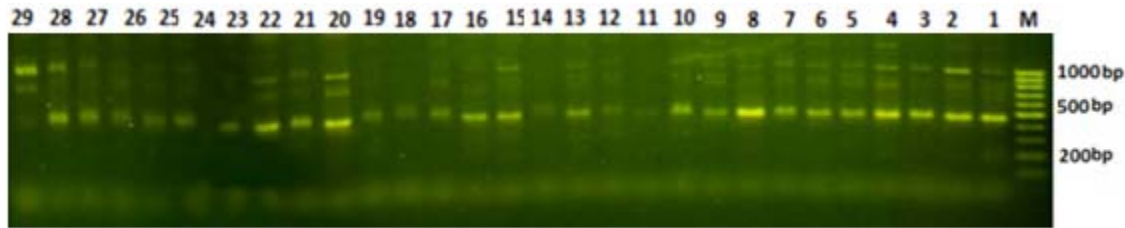

233

234 (C) REP

235 **Figure 2.** Fingerprint pattern for 29 *F. culmorum* isolates by using three primer pairs: (A)  
236 BOX-ERIC2, (B) ERIC-ERIC2 and (C) REP.

237

## 238 DISCUSSION

239 Genetic diversity studies of pathogen populations are important for understanding the  
240 genetic potential of economically important pathogens to adapt to climate change and the  
241 implications for management of diseases caused by these pathogens (McDonald and  
242 Linde 2002). *F. culmorum* has also been reported to cause seed-borne diseases of pre-  
243 and post-emergence seedling death and is one of the causal species of Fusarium head  
244 blight (FHB) (Polley and Turner 1995). In this study, **89.7%** of the *F. culmorum* isolates  
245 were pathogenic towards wheat at the seedling stage, while a smaller **10.3%** number of  
246 isolates were non-pathogenic.

247

248 As the results of our study of the genetic diversity among 29 isolates of *F. culmorum*  
249 collected from different regions of Iraq show, there is no relationship between geographic  
250 location and genetic similarity of the isolates. We suggest that this means that *F.*  
251 *culmorum* populations have the ability to survive and adapt to different and extreme  
252 variations in climate, from the cold area in northern Iraq with temperatures ranging from

253 -5 to 10°C in winter and 35 to 45°C in summer; to central and southern Iraq where  
254 temperatures range from around 5 to 15°C during winter to 45 to 55°C in the summer.

255

256 Many studies of DNA analysis have been reported to investigate genetic variability and  
257 population structure of *F. culmorum* using a variety of molecular markers, such as  
258 random amplified polymorphic DNA (RAPD) (De Nijs et al. 1995; Gargouri et al. 2003;  
259 Yörük and Albayrak, 2013) and restriction fragment length polymorphism (RFLP)  
260 (Nicholson et al 1993; Llorensa et al. 2006). These studies suggest that there is extensive  
261 genetic diversity in *F. culmorum* populations. In addition, Mishra et al. (2003) found a  
262 high degree of intra-specific polymorphism among *F. culmorum* isolates using inter-  
263 simple sequence repeat (ISSR) analysis. Albayrak et al. (2016) also studied the  
264 relationship between *Fusarium* isolates according to their species and geographic regions  
265 by using ISSR markers. In another study, Bayraktar and Fatma (2010) found that ISSR  
266 markers have a high degree of intra- and interspecific polymorphisms among *Fusarium*  
267 spp. Finally, Gargouri et al. (2003) used RAPD markers to study the genetic variability  
268 and population structure of *Fusarium culmorum* isolated from wheat stem bases.

269

270 In addition to the genetic diversity and variation in pathogenicity towards wheat  
271 presented in this study, populations of *F. culmorum* are also characterized by high levels  
272 of phenotypic variability in culture, such as sporulation, pigmentation, mycotoxin  
273 production, and colony morphology (Puhalla 1981). Gang et al. (1998) found a large  
274 variation among *F. culmorum* isolates collected from the various geographic areas for  
275 aggressiveness, race designation and mycotoxin production.

276

## 277 CONCLUSION

278 This is the first report of the genetic diversity of *F. culmorum* populations present in Iraq  
279 using the REP-PCR method. Two groups of *F. culmorum* were identified in this study  
280 according to minimum variance (Squared Euclidean). This is the first study in this field  
281 that has been reported in Iraq. Although the study was limited to 29 isolates due to the  
282 difficulty in completing more extensive sampling, this study provides a first glimpse at  
283 the genetic diversity and variation in pathogenicity present in *F. culmorum* populations in  
284 Iraq.

285

## 286 ACKNOWLEDGMENTS

287 This work was carried out and supported by the University of Minnesota, Department of  
288 Plant Pathology. Thanks to Dr. Scott Bates and Dr. Zewei Song for all the support and  
289 help to complete this paper.

290

## 291 REFERENCES

- 292 1. Albayrak, G., Emre, Y., Aylin, G., Bahram, S. (2016). Genetic diversity among  
293 *Fusarium graminearum* and *F. culmorum* isolates based on ISSR markers, Arch Biol  
294 Sci, 68(2), 333-343. doi:10.2298/ABS150630025A
- 295 2. Balmas, V., Delogu, G., Sposito, S., Rau, D., Migheli, Q. (2006). Use of a  
296 complexation of tebuconazole with b-cyclodextrin for controlling foot and crown rot of  
297 durum wheat incited by *Fusarium culmorum*. The Journal of Agricultural and Food  
298 Chemistry, 54, 480-484, doi: 10.1021/jf0523014

- 299 3. Bayraktar, H., and Fatma, D. (2010). Molecular Identification and Genetic Diversity  
300 of *Fusarium* species Associated with Onion Fields in Turkey, 159 (1), 28–34. DOI:  
301 10.1111/j.1439-0434.2010.01715.x
- 302 4. Berna, T., Friday, O., Gul, E., Rhyannyn, W., Julie, N., Sukumar, C. (2012). Fitness of  
303 three *Fusarium* pathogens of wheat. FEMS Microbiol Ecol 81 596–609. doi:  
304 10.1111/j.1574-6941.2012.01388.x
- 305 5. Blandino, M., Haidukowski, M., Pascale, M., Plizzari, L., Scudellari, D., Reyneri, A.  
306 (2012). Integrated strategies for the control of *Fusarium* head blight and  
307 deoxynivalenol contamination in winter wheat. Field Crops Research, 133, 139-149,  
308 doi: 10.1016/j.fcr.2012.04.004
- 309 6. Booth, C. (1971). The Genus *Fusarium*. Commonwealth Mycological Institute, Kew,  
310 Surrey. Farnham Royal, England: Commonwealth Agricultural Bureaux [for the]  
311 Commonwealth Mycological Institut, United Kingdom, Pp, 237.
- 312 7. Burgess, L.W., Backhouse, D., Summerell, B.A., Swan, L.J. (2001). Crown rot of  
313 wheat In: Summerell BA, Leslie JF, Backhouse D, Bryden WL, Burgess LW (eds),  
314 *Fusarium*: Paul E. Nelson Memorial Symposium. APS Press, St. Paul, Minnesota,  
315 USA, pp, 271-294.
- 316 8. Chakraborty, S., Liu, C.J., Mitter, V., Scott, J.B., Akinsanmi, O.A., Ali, S., Dill-Macky,  
317 R., Nicol, J., Backhouse, D., Simpfendorfer, S. (2006). Pathogen population structure  
318 and epidemiology are keys to wheat crown rot and *Fusarium* head blight management.  
319 Australasian Plant Pathology, 35, 643-655, doi: 10.1071/AP06068
- 320 9. De Nijs, M., Larson, J. S., Gams, W., Rombouts, F. M., Wernas, K., Thrane, U. (1997).  
321 Variation in random amplified polymorphic DNA patterns and secondary metabolic



- 322 profiles within *Fusarium* species from cereals from various parts of The Netherlands.  
323 Food Microbiology, 14, 449-457.
- 324 10. Edel, V., Steinberg, C., Avelange, I., Laguerre, G., Alabouvette, C. (1995). Comparison  
325 of three molecular methods for the characterization of *Fusarium oxysporum* strains.  
326 Phytopathology, 85, 579-585, doi: 10.1094/Phyto-85-579
- 327 11. El-Khalifeh, M., El-Ahmed, A., Al-Saleh, A., Nachit, M. (2009). Use of AFLPs to  
328 differentiate between *Fusarium* species causing root rot disease on durum wheat  
329 (*Triticum turgidum* L. var. *durum*). African Journal of Biotechnology, 8, 4347-4352.
- 330 12. Emre, Y., Berna, T., Bayram, K., Fatih, Ö., Gülşen, U., Işıl, Z., Ayşegül, S.,  
331 Gonca, M. (2016) . Characterization of high-level deoxynivalenol producer *Fusarium*  
332 *graminearum* and *F. culmorum* isolates caused head blight and crown rot diseases in  
333 Turkey, J Plant Dis Prot, 123: 177-186. doi:10.1007/s41348-016-0027-y
- 334 13. Eslahi, M., (2012). Fungi associated with root and crown rot of wheat in Khuzestan  
335 province, Iran. Journal of Crop Protection, 1(2), 107-113.
- 336 14. Fang, Ji., Jirong, W., Hongyan, Z., Jianhong, X., Jianrong, S. (2015) . Relationship of  
337 Deoxynivalenol Content in Grain, Chaff, and Straw with *Fusarium* Head Blight  
338 Severity in Wheat Varieties with Various Levels of Resistance, Toxins, 7, 728-742.  
339 doi:10.3390/toxins7030728
- 340 15. Gang, G., Miedaner, T., Schuhmacher, U., Schollenberger, M., Geiger, H.H. (1998).  
341 Deoxynivalenol and nivalenol production by *Fusarium culmorum* isolates differing in  
342 aggressiveness toward winter rye. Phytopathology, 88,879-884, doi: 10.1094/PHYTO  
343 .1998.88.9.879

- 344 16. Gargouri, S., Louis, B., Mohamed, H., Mohamed, M. (2003). Genetic Variability and  
345 Population Structure of the Wheat Foot Rot Fungus, *Fusarium culmorum*, in Tunisia,  
346 European Journal of Plant Pathology, 109, 807- 815. doi:10.1023/A:1026137817723
- 347 17. Gurel, F., Albayrak, G., Diken, O., Cepni, E., Tunali, B. (2010). Use of REP-PCR for  
348 Genetic Diversity Analyses in *Fusarium culmorum*. J. Phytopathology, 158,387–389,  
349 doi: 10.1111/j.1439-0434.2009 .01630.x
- 350 18. Hajieghrar, B. (2009). Wheat crown and root rotting fungi in Moghan area, Northwest  
351 of Iran, African Journal of Biotechnology, 8 (22), 6214-6219. doi:  
352 10.5897/AJB09.1087
- 353 19. John, F. L., & Brett, A.S. (2006). The Fusarium Laboratory Manual. Blackwell  
354 Publisher, London, pp 388, doi: 10.1002/9780470278376
- 355 20. Kollers, S., Bernd, R., Jie, L., Viktor, K., Erhard, E. , Odile, A., Maike, H., Jorg, P.,  
356 Dagmar, K., Martin, G., Marion, S. Roder. (2013). Whole Genome Association  
357 Mapping of Fusarium Head Blight Resistance in European Winter Wheat (*Triticum*  
358 *aestivum* L.), PLoS One, 8 (2): e57500. doi: 10.1371/journal.pone.0057500
- 359 21. Kovach, WL. (2001). MVSP: Multivariate statistical package v3.12f. Kovach  
360 Computing Services, Pentraeth, Anglesey, UK.
- 361 22. Llorensa, A., Hinojoa, M., Mateob, R., González-Jaénc, M., Valle-Algarab,  
362 F., Logriecod, A., Jiménez, M. (2006). Characterization of *Fusarium* spp. isolates by  
363 PCR-RFLP analysis of the intergenic spacer region of the rRNA gene (rDNA),  
364 International Journal of Food Microbiology, 106, (3), 297–306. doi: 10.1016/j.ijf  
365 oodmicro.2005.09.005

- 366 23. Matny, O.N., Chakraborty, S., Obanar, F., AL-Ani, R.A. (2012). Molecular  
367 identification of *Fusarium* spp. causing crown rot and head blight on winter wheat in  
368 Iraq. *Journal of Agricultural Technology*, 8(5), 1677-1690.
- 369 24. McDonald, B.A., & Linde, C. (2002). The population genetics of plant pathogens and  
370 breeding for durable resistance. *Euphytica*, 124, 163-180, doi: 10.1023/A:10156  
371 78432355
- 372 25. Miedaner, T., Würschum, T., Maurer, H., Korzun, V., Ebmeyer, E. (2013). Whole  
373 Genome Association mapping for *Fusarium* head blight resistance in European soft  
374 winter wheat, *Mol Breed*, 28, 647–655.
- 375 26. Mishra, P.K., Fox, R.T., & Cutham, A. (2003). Inter-simple sequence repeat and  
376 aggressiveness analyses revealed high genetic diversity, recombination and long range  
377 dispersal in *Fusarium culmorum*. *Annals of Applied Biology*, 143, 291-301, doi:  
378 10.1111/j.1744-7348.2003.tb00297.x
- 379 27. Mitter, V., Zhang, M. C., Liu, C. J., Ghosh, R., Ghosh, M., & Chakraborty, S. (2006).  
380 A high-throughput glasshouse bioassay to detect crown rot resistance in wheat  
381 germplasm. *Plant Pathology*, 55,433-441, doi: 10.1111/j.1365-3059.2006.01384.x
- 382 28. Nicholson, P., Jenkinson, P., Rezanoor, H.N., & Parry, D.W. (1993). Restriction  
383 fragment length analysis of variation in *Fusarium* species causing ear blight of cereals.  
384 *Plant Pathology*, 42, 905-914, doi: 10.1111/j.1365-3059.1993.tb02676.x
- 385 29. O'Donnell, K., Kistler, H.C., Tacke, B.K., Casper, H.H. (2000). Gene genealogies  
386 reveal global phylogeographic structure and reproductive isolation among lineages of  
387 *Fusarium graminearum*, the fungus causing wheat scab. *Proceedings of the National*  
388 *Academy of Sciences, USA*, 9, 7905-7910.

- 389 30. Pestka, J.J., & Smolinski, A.T. (2005). Deoxynivalenol: toxicology and potential  
390 effects on humans. *Journal of Toxicology and Environmental Health. Part B, Critical*  
391 *Review*, 8, 39-69, doi: 10.1080/10937400590889458
- 392 31. Polley, R. W., & Turner, J. A. (1995). Surveys of stem base diseases and *Fusarium* ear  
393 diseases in winter wheat in England, Wales and Scotland 1989–1990. *Annals of*  
394 *Applied Biology*, 126, 49-59, doi: 10.1111/j.1744-7348.1995.tb05002.x
- 395 32. Puhalla, J.E. (1981). Genetic considerations of the genus *Fusarium*. pp. 291–305. In:  
396 *Fusarium Diseases, Biology, and Taxonomy* (Nelson P.E., Toussoun T.A, Cook R.J.,  
397 ed.),. University Park, Pennsylvania, Pennsylvania State University Press, PA, USA.
- 398 33. Saharan, M., Naef, A. (2008) . Detection of genetic variation among Indian wheat head  
399 scab pathogens (*Fusarium* spp. isolates) with microsatellite markers. *Crop Protection*,  
400 27, 1148–1154. doi: 10.1016/j.cropro.2008.01.008
- 401 34. Scherm, B., Balmas, V., Spanu, F., Pani, G., Delogu, G., Pasquali, M., Migheli, Q.  
402 (2013). *Fusarium culmorum*: Causal agent of foot and root rot and head blight on  
403 wheat. *Molecular Plant Pathology*, 14(4), 323-341, doi: 10.1111/mpp.12011
- 404 35. Smiley, R., Gourlie, J., Easley, S., Patterson, L-M., Whittaker, R. (2005). Crop damage  
405 estimates for crown rot of wheat and barley in the Pacific Northwest. *Plant Disease*, 89,  
406 595-604, doi:10.1094/PD-89-0595
- 407 36. Tunal, B., Nicol, J., Erol, F.Y., Altiparmak, G. (2006). Pathogenicity of Turkish crown  
408 and head scab isolates on stem bases on winter wheat under greenhouse conditions.  
409 *Plant Pathology Journal*, 5(2), 143-149, doi: 10.3923/ppj.2006.143.149
- 410 37. Versalovic, J., Koeuth, T., Lupski, J.R. (1991). Distribution of repetitive DNA  
411 sequences in eubacteria and application to fingerprinting of bacterial genomes. *Nucleic*  
412 *Acids Res*, 19, 6823–6831.

- 413 38. Winter, M., Koopmann, B., Döll, K., Karlovsky, P., Kropf, U., Schlüter, K., von  
414 Tiedemann, A. (2013). Mechanisms regulating grain contamination with trichothecenes  
415 translocated from the stem base of wheat (*Triticum aestivum*) infected with *Fusarium*  
416 *culmorum*. *Phytopathology* 103:682-689. doi: 10.1094/PHYTO-11-12-0296-R
- 417 39. Yörük, E., G. Albayrak. (2013). Genetic characterization of *Fusarium graminearum*  
418 and *F. culmorum* isolates from Turkey by using random-amplified polymorphic DNA,  
419 *Genet. Mol. Res*, 12 (2), 1360-1372, doi: 10.4238/2013.April.25.7
